# Supplementary material
Source: publisher site journal article supplement (https://www.dovepress.com/article/370488)
Supplement: Supplementary file 1 [file get_supplementary_file.php]

Supplementary material

Sleep Inertia Countermeasures for Emergency Services Personnel

Start of Block: Introduction and Consent Page

Q1 **Strategies to optimise performance upon waking for on-call and shift-working emergency service personnel**   Thank you for your interest in our research which looks at the practicality and effectiveness of strategies to optimise performance upon waking in the workplace. This survey will take approximately 15 minutes to complete.   **Benefits and risk of participation** In this survey, you will be asked to provide some demographic information including your age, gender, location of employment, employment industry, and other information about the types of shifts you work and what you do during your shifts. You will also be asked about your experiences of performing work soon after waking, as well as providing your opinion on a range of strategies to optimise waking performance so that we can determine the strategies that would be most practical and effective to implement in the workplace. In addition, this survey will gather further information on the informal strategies that you may currently use to optimise your performance upon waking, how useful these informal strategies are, and ways that these strategies could be improved. This information will help guide further research into strategies that can successfully and practically optimise performance upon waking in the workplace. It is not anticipated that you will experience any distress or discomfort by participating in this survey. However, if you do experience any distress while completing this survey please contact Beyond Blue for free and immediate mental health support: 1300 22 4636. There is no remuneration for participating in this study.   **Participation and Confidentiality/Anonymity** Participation is completely voluntary and to maintain your anonymity no identifiable information will be collected. Participants can withdraw from the study prior to submission of responses by closing the browser window, however submitted responses cannot be withdrawn due to the anonymous nature of the survey. All data gathered from the survey will be kept on a password-protected computer. Data will be stored securely for a minimum of fifteen years and then will be destroyed in accordance with CQUniversity policy.   **Outcome, Publication, and Feedback** Data collected from this survey will be published as part of a doctoral thesis, journal publications, and conference presentations. Since the survey is anonymous, there will be no identifiable information published. If you wish to receive a plain English statement of results once data has been analysed, please send an email to Katya Kovac at k.kovac@cqu.edu.au.   **Consent** Completion and submission of the survey will be taken as consent to participate in this study and for the data to be used in any future publications and presentations.   **Questions and Concerns** If you have any questions or concerns or would like any further information about this study, please do not hesitate to contact Katya Kovac at k.kovac@cqu.edu.au. This project has been approved by the CQUniversity Human Research Ethics Committee (approval number: 0000022402).   **I consent to participate in this research project and agree that:** I have read and understood the information above that describes this study;   Any questions I had about the project were answered by either the information above or the study coordinator;  I understand that submitted survey responses cannot be withdrawn due to the anonymous nature of this survey;  I understand that I will not be remunerated for participating in this study;  To protect my privacy, my name will not be collected; and  I am providing informed consent to participate in this project.

- I consent
- I do not consent

End of Block: Introduction and Consent Page

Start of Block: Demographics/Working Context

Q2 **The following section will provide us with some information about your work background and your sleep.**

Q3 What is your age group?

- Less than 25 years old
- 25-34 years old
- 35-44 years old
- 45-54 years old
- 55-64 years old
- 65 years or over

Q4 What gender do you identify as?

- Male
- Female
- Other

| 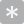 |
| --- |

Q5 What postcode do you primarily work in?

________________________________________________________________

Q6 What area of emergency services are you **primarily** involved in?

- Police (salaried)
- Police (retained)
- Police (volunteer)
- Ambulance (salaried)
- Ambulance (retained)
- Ambulance (volunteer)
- Fire and rescue (salaried)
- Fire and rescue (retained)
- Fire and rescue (volunteer)
- State emergency services (salaried)
- State emergency services (retained)
- State emergency services (volunteer)
- Other (please specify) ________________________________________________

Q7 How long have you been involved in the emergency service field?

- Less than 12 months
- 1-2 years
- 2-5 years
- 5-10 years
- More than 10 years

Q8a What type of schedule do you work/volunteer in your **primary emergency service role**?

- Regular day-time schedule (any time between 7am and 7pm)
- Regular morning shift
- Regular afternoon shift
- Regular night shift
- Regular evening shift
- Rotating shift work (combination of days/nights and/or evenings)
- Regular day shifts and on-call at other times
- Regular night shifts and on-call at other times
- Regular rotating shifts and on-call at other times
- Only on-call
- Other (please specify) ________________________________________________

Q8b Do you ever have the opportunity to recline or rest on shift?

- Yes
- No

Q9  If you work rotating shifts and are rostered on an evening or night shift, are you allowed the opportunity to recline or nap on-shift?

- Yes
- No

Q10 If you are allowed the opportunity to recline or nap on-shift, which one of the following do you do most of the time?

- I will not try to rest or sleep
- I will rest but not close eyes (sitting or reclining while on the phone, etc.)
- I will recline and close my eyes but try not to fall asleep
- I will recline and may fall asleep
- I will recline and actively try to sleep

| Page Break |  |
| --- | --- |

Q10b Why do you choose not to sleep while on-shift?

________________________________________________________________

| Page Break |  |
| --- | --- |

Q11 Do you ever avoid sleeping/napping on shift to avoid feeling groggy or half asleep upon waking?

- Yes
- No

| Page Break |  |
| --- | --- |

Q12 Please briefly describe your rest, nap or sleep environment at work.

 For example:  Are there beds or recliners available? Is there a dedicated space to nap or sleep, such as in a separate room? Is the room dark or bright? Is the room quiet or noisy? Are there other people in the room who are sleeping or awake?

________________________________________________________________

Q13 If you work or volunteer on-call, are you:

- On-call from home
- On-call on-site (i.e., at workplace, volunteer site, volunteer headquarters, etc.)
- Mix of on-call from home and on-site

| Page Break |  |
| --- | --- |

Q14a Typically, if you are on-call, do you sleep at any time during the on-call period?

- Yes
- No

Q14b Why do you choose not to sleep during your on-call period?

________________________________________________________________

| Page Break |  |
| --- | --- |

Q15 Do you ever avoid sleeping/napping while on-call to avoid feeling groggy or half-asleep if you receive a call?

- Yes
- No

End of Block: Demographics/Working Context

Start of Block: Experiences of sleep inertia

Q16 What is sleep inertia?   Sleep inertia is the groggy, sleepy state that you may feel immediately after waking. During sleep inertia you also tend to perform tasks worse than compared to when you’re wide awake. Sleep inertia is worse immediately after waking and gets better over time. It can take 20-30 minutes for sleep inertia to wear off, but full recovery can take up to 2 hours or more.   Sleep inertia countermeasures are strategies that can be used to reduce sleep inertia, thus helping you to wake up quicker.    **The following section will explore your experiences of sleep inertia at work in your primary emergency service role.**

| Page Break |  |
| --- | --- |

Q17 How often do you experience sleep inertia when you wake to immediately respond to your emergency service role?

- Always
- Often
- Sometimes
- Rarely
- Never

Q18a Is sleep inertia a safety concern for you personally?

- Yes
- No

Q18b You indicated that sleep inertia is a safety concern for you personally. Please describe why.

________________________________________________________________

| Page Break |  |
| --- | --- |

Q19a Is sleep inertia a safety concern for you broadly (e.g., in regard to the safety of others)?

- Yes
- No

Q19b You indicated that sleep inertia is a safety concern for you broadly. Please describe why.

________________________________________________________________

| Page Break |  |
| --- | --- |

Q20 Do you do anything in particular to help wake yourself up (i.e., reduce sleep inertia) when woken to immediately respond for your emergency services role?

- Yes
- No

Q21 What do you typically do to help wake yourself up (i.e., reduce sleep inertia) when woken to respond for your emergency services role?

________________________________________________________________

Q22 How much does your waking procedure described above actually help to wake you up?

|  | Does not wake me up | Somewhat wakes me up | Completely wakes me up |
| --- | --- | --- | --- |

|  | 1 | 2 | 3 | 4 | 5 |
| --- | --- | --- | --- | --- | --- |

| 3 | 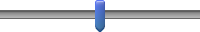 |
| --- | --- |

End of Block: Experiences of sleep inertia

Start of Block: Sleep inertia countermeasures

| Page Break |  |
| --- | --- |

Q24 In this section, we will introduce a number of strategies that have previously been investigated as sleep inertia countermeasures (i.e., strategies to help wake up quicker).    These strategies include: A short burst of exercise on equipment (e.g., a stationary bike) A short burst of exercise without equipment (e.g., star jumps) Chewing caffeinated gum upon waking Face washing upon waking  Drinking a cup of coffee upon waking Exposure to bright lights upon waking Listening to your favourite up-beat music upon waking
 We would like to know what the main barriers might be to introducing each of these strategies into your workplace.

| Page Break |  |
| --- | --- |

Q25 **Sleep inertia strategy #1**   **A short burst of exercise on equipment (e.g., a stationary bike) upon waking.**   **Please select from the following list, what would be the main barriers, if any, to introducing this strategy into your workplace?**  

|  |  |
| --- | --- |
|  | Please select all that apply |
| No barriers |  |
| This strategy is already formally used in my workplace |  |
| Accessibility of equipment (workplace doesn’t have the equipment) |  |
| Space |  |
| Cost |  |
| Comfort |  |
| Time (it would take too long) |  |
| Workplace would not support or allow it |  |
| Other barriers |  |

| Page Break |  |
| --- | --- |

Q25A What other potential barriers may there be for introducing a short burst of exercise on equipment (e.g., a stationary bike) upon waking as a sleep inertia countermeasure?

________________________________________________________________

________________________________________________________________

________________________________________________________________

________________________________________________________________

________________________________________________________________

Q25B You selected that a short burst of exercise on equipment (e.g., a stationary bike) is already being used as a sleep inertia countermeasure in your workplace. 
 
Please describe how this strategy is being used in your workplace (please describe in a sentence or two):

________________________________________________________________

Q25C How successful is this strategy in reducing sleep inertia?

|  | Not successful at all | Somewhat successful | Very successful |
| --- | --- | --- | --- |

|  | 1 | 2 | 3 | 4 | 5 |
| --- | --- | --- | --- | --- | --- |

| 1 | 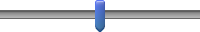 |
| --- | --- |

| Page Break |  |
| --- | --- |

Q26
**Sleep inertia strategy #2**
  **A short burst of exercise without equipment (e.g., star jumps).**
 
**Please select from the following list, what would be the main barriers, if any, to introducing this strategy into your workplace?**

|  |  |
| --- | --- |
|  | Please select all that apply |
| No barriers |  |
| This strategy is already formally used in my workplace |  |
| Accessibility of equipment (workplace doesn’t have the equipment) |  |
| Space |  |
| Cost |  |
| Comfort |  |
| Time (it would take too long) |  |
| Workplace would not support or allow it |  |
| Other barriers |  |

| Page Break |  |
| --- | --- |

Q26A What other potential barriers may there be for introducing a short burst of exercise without equipment (e.g., star jumps) upon waking as a sleep inertia countermeasure?

________________________________________________________________

________________________________________________________________

________________________________________________________________

________________________________________________________________

________________________________________________________________

Q26B You selected that a short burst of exercise without equipment (e.g., star jumps) is already being used as a sleep inertia countermeasure in your workplace. 
 
Please describe how this strategy is being used in your workplace (please describe in a sentence or two):

________________________________________________________________

Q26C How successful is this strategy in reducing sleep inertia?

|  | Not successful at all | Somewhat successful | Very successful |
| --- | --- | --- | --- |

|  | 1 | 2 | 3 | 4 | 5 |
| --- | --- | --- | --- | --- | --- |

| 1 | 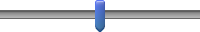 |
| --- | --- |

| Page Break |  |
| --- | --- |

Q27 **Sleep inertia strategy #3**   **Drinking a cup of coffee upon waking.**   **Please select from the following list, what would be the main barriers, if any, to introducing this strategy into your workplace?**

|  |  |
| --- | --- |
|  | Please select all that apply |
| No barriers |  |
| This strategy is already formally used in my workplace |  |
| Accessibility of equipment (workplace doesn’t have the equipment) |  |
| Space |  |
| Cost |  |
| Comfort |  |
| Time (it would take too long) |  |
| Workplace would not support or allow it |  |
| Other barriers |  |

| Page Break |  |
| --- | --- |

Q27A What other potential barriers may there be for introducing drinking a cup of coffee upon waking as a sleep inertia countermeasure?

________________________________________________________________

Q27B You selected that drinking a cup of coffee upon waking is already being used as a sleep inertia countermeasure in your workplace. 
 
Please describe how this strategy is being used in your workplace (please describe in a sentence or two):

________________________________________________________________

Q27C How successful is this strategy in reducing sleep inertia?

|  | Not successful at all | Somewhat successful | Very successful |
| --- | --- | --- | --- |

|  | 1 | 2 | 3 | 4 | 5 |
| --- | --- | --- | --- | --- | --- |

| 1 | 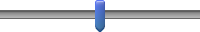 |
| --- | --- |

| Page Break |  |
| --- | --- |

Q28 **Sleep inertia strategy #4**   **Exposure to bright lights upon waking.**   **Please select from the following list, what would be the main barriers, if any, to introducing this strategy into your workplace?**

|  |  |
| --- | --- |
|  | Please select all that apply |
| No barriers |  |
| This strategy is already formally used in my workplace |  |
| Accessibility of equipment (workplace doesn’t have the equipment) |  |
| Space |  |
| Cost |  |
| Comfort |  |
| Time (it would take too long) |  |
| Workplace would not support or allow it |  |
| Other barriers |  |

| Page Break |  |
| --- | --- |

Q28A What other potential barriers may there be for introducing bright light exposure upon waking as a sleep inertia countermeasure?

________________________________________________________________

Q28B You selected that bright light exposure upon waking is already being used as a sleep inertia countermeasure in your workplace. 
 
 Please describe how this strategy is being used in your workplace (please describe in a sentence or two):

________________________________________________________________

Q28C How successful is this strategy in reducing sleep inertia?

|  | Not successful at all | Somewhat successful | Very successful |
| --- | --- | --- | --- |

|  | 1 | 2 | 3 | 4 | 5 |
| --- | --- | --- | --- | --- | --- |

| 1 | 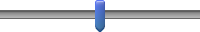 |
| --- | --- |

| Page Break |  |
| --- | --- |

Q29 Sleep inertia strategy #5   Chewing caffeinated gum upon waking.   **Please select from the following list, what would be the main barriers, if any, to introducing this strategy into your workplace?**

|  |  |
| --- | --- |
|  | Please select all that apply |
| No barriers |  |
| This strategy is already formally used in my workplace |  |
| Accessibility of equipment (workplace doesn’t have the equipment) |  |
| Space |  |
| Cost |  |
| Comfort |  |
| Time (it would take too long) |  |
| Workplace would not support or allow it |  |
| Other barriers |  |

| Page Break |  |
| --- | --- |

Q29A What other potential barriers may there be for introducing chewing caffeinated gum upon waking as a sleep inertia countermeasure?

________________________________________________________________

Q29B You selected that chewing caffeinated gum upon waking is already being used as a sleep inertia countermeasure in your workplace.
 
 Please describe how this strategy is being used in your workplace (please describe in a sentence or two):

________________________________________________________________

Q29C How successful is this strategy in reducing sleep inertia?

|  | Not successful at all | Somewhat successful | Very successful |
| --- | --- | --- | --- |

|  | 1 | 2 | 3 | 4 | 5 |
| --- | --- | --- | --- | --- | --- |

| 1 | 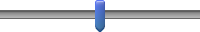 |
| --- | --- |

| Page Break |  |
| --- | --- |

Q30 **Sleep inertia strategy #6**   **Face washing upon waking.**   **Please select from the following list, what would be the main barriers, if any, to introducing this strategy into your workplace?**

|  |  |
| --- | --- |
|  | Please select all that apply |
| No barriers |  |
| This strategy is already formally used in my workplace |  |
| Accessibility of equipment (workplace doesn’t have the equipment) |  |
| Space |  |
| Cost |  |
| Comfort |  |
| Time (it would take too long) |  |
| Workplace would not support or allow it |  |
| Other barriers |  |

| Page Break |  |
| --- | --- |

Q30A What other potential barriers may there be for introducing face washing upon waking as a sleep inertia countermeasure?

________________________________________________________________

Q30B You selected that face washing upon waking is already being used as a sleep inertia countermeasure in your workplace. 
 
 Please describe how this strategy is being used in your workplace (please describe in a sentence or two):

________________________________________________________________

Q30C How successful is this strategy in reducing sleep inertia?

|  | Not successful at all | Somewhat successful | Very successful |
| --- | --- | --- | --- |

|  | 1 | 2 | 3 | 4 | 5 |
| --- | --- | --- | --- | --- | --- |

| 1 | 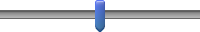 |
| --- | --- |

| Page Break |  |
| --- | --- |

Q31 **Sleep inertia strategy #7**   **Listening to your favourite up-beat music upon waking.**   **Please select from the following list, what would be the main barriers, if any, to introducing this strategy into your workplace**

|  |  |
| --- | --- |
|  | Please select all that apply |
| No barriers |  |
| This strategy is already formally used in my workplace |  |
| Accessibility of equipment (workplace doesn’t have the equipment) |  |
| Space |  |
| Cost |  |
| Comfort |  |
| Time (it would take too long) |  |
| Workplace would not support or allow it |  |
| Other barriers |  |

| Page Break |  |
| --- | --- |

Q31A What other potential barriers may there be for introducing listening to your favourite up-beat music upon waking as a sleep inertia countermeasure?

________________________________________________________________

Q31B You selected that listening to your favourite up-beat music upon waking is already being used as a sleep inertia countermeasure in your workplace.
 
 Please describe how this strategy is being used in your workplace (please describe in a sentence or two):

________________________________________________________________

Q31C How successful is this strategy in reducing sleep inertia?

|  | Not successful at all | Somewhat successful | Very successful |
| --- | --- | --- | --- |

|  | 1 | 2 | 3 | 4 | 5 |
| --- | --- | --- | --- | --- | --- |

| 1 | 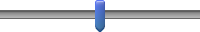 |
| --- | --- |

| Page Break |  |
| --- | --- |

Q32 Which of these strategies would you actually want to use?   Please select 'yes' if you would use this strategy or 'no' if you would not use this strategy. If you select 'no' please briefly explain why you would not use this strategy.

|  | Would you **use** this strategy upon waking? | | If you answered 'no' please explain why you would not use this strategy upon waking. |
| --- | --- | --- | --- |
|  | Yes | No | Please respond in 1-2 sentences |
| A short burst of exercise on equipment (e.g., a stationary bike) |  |  |  |
| A short burst of exercise without equipment (e.g., star jumps) |  |  |  |
| Chewing caffeinated gum upon waking |  |  |  |
| Face washing upon waking |  |  |  |
| Drinking a cup of coffee |  |  |  |
| Exposure to bright lights |  |  |  |
| Listening to your favourite music |  |  |  |

| Page Break |  |
| --- | --- |

Q33 Which of these strategies do you believe **would actually reduce sleep inertia?**   Please select 'yes' if you believe this strategy would reduce sleep inertia or 'no' if you believe this strategy would not reduce sleep inertia.  If you select 'no' please briefly explain why you believe this strategy would not reduce sleep inertia.

|  | Do you believe this strategy would reduce sleep inertia upon waking? | | If you answered 'no' please explain why you believe that this strategy would not reduce sleep inertia |
| --- | --- | --- | --- |
|  | Yes | No | Please respond in 1-2 sentences. |
| A short burst of exercise on equipment (e.g., a stationary bike) |  |  |  |
| A short burst of exercise without equipment (e.g., star jumps) |  |  |  |
| Chewing caffeinated gum upon waking |  |  |  |
| Face washing upon waking |  |  |  |
| Drinking a cup of coffee |  |  |  |
| Exposure to bright lights |  |  |  |
| Listening to your favourite music |  |  |  |

End of Block: Sleep inertia countermeasures

Start of Block: Other sleep inertia countermeasures

Q34 **The following section allows you to describe any other strategies that you think may work to reduce sleep inertia, including anything that could be changed in your workplace.**

| Page Break |  |
| --- | --- |

Q35 Does your emergency service workplace or volunteer organisation have any management strategies for sleep inertia that have **not yet been covered** in this survey?

- Yes
- No

Q36 If yes, please describe your organisations strategies for managing sleep inertia.

________________________________________________________________

Q37 Are these strategies successful? (I.e., do they help reduce sleep inertia?)
 
Explain why or why not for each strategy described.

________________________________________________________________

Q38 Do people to use these sleep inertia strategies at your workplace or volunteer organisation? If 'no', then please explain why not?

- Yes
- No ________________________________________________

Q39 What changes could be made in your workplace to reduce sleep inertia? (E.g., this may include things such as changing shift schedules). Please be as specific as possible.

________________________________________________________________

| Page Break |  |
| --- | --- |

Q40 Are there any other strategies that have **not yet been covered** in this survey that you think would work in reducing sleep inertia?

________________________________________________________________

Q41 If there is any further information that you would like us to know about sleep inertia and your workplace, please provide it below.

________________________________________________________________

End of Block: Other sleep inertia countermeasures

Start of Block: Block 5

Q41 **Thank you for completing our survey. Remember that if you experienced any distress while completing this survey please contact Beyond Blue for immediate mental health support: 1300 22 4636. If you have any questions or concerns, please contact Katya Kovac at k.kovac@cqu.edu.au.**

End of Block: Block 5
